# Supplementary material for: Novel Fe hydrides and magnetism in the Fe-H system at high pressures
Source: Research Square preprint supplement (doi:10.21203/rs.3.rs-148484/v1), 2021-02-12
Supplement: Supplementary file 1 [file 8f74778407cccf4f75090f81.docx]

Novel Fe hydrides and magnetism in the Fe-H system at high pressures

I. Kupenko1,*, E. Bykova2,3, D.M. Vasiukov4,5, G. Aprilis4, V. Cerantola6, A.I. Chumakov6, J. Jacobs6, M. Bykov3, E. Koemets3, S. Chariton3, C. Sanchez-Valle1 and L. Dubrovinsky3

*1Institut für Mineralogie, University of Münster, Corrensstr. 24, 48149 Münster, Germany*

*2Photon Science, Deutsches Elektronen-Synchrotron, Notkestrasse 85, 22607, Hamburg, Germany*

*3Bayerisches Geoinstitut, University of Bayreuth, D-95440, Bayreuth, Germany*

*4Material Physics and Technology at Extreme Conditions, Laboratory of Crystallography, University of Bayreuth, D-95440 Bayreuth, Germany*

5Synchrotron Radiation Research, Lund University, Box 118, S-221 00 Lund, Sweden,

*6ESRF-The European Synchrotron, CS 40220, 38043, Grenoble, Cedex 9, France*

# *Corresponding author: [kupenko@uni-muenster.de](mailto:kupenko@uni-muenster.de)

# Supplementary data


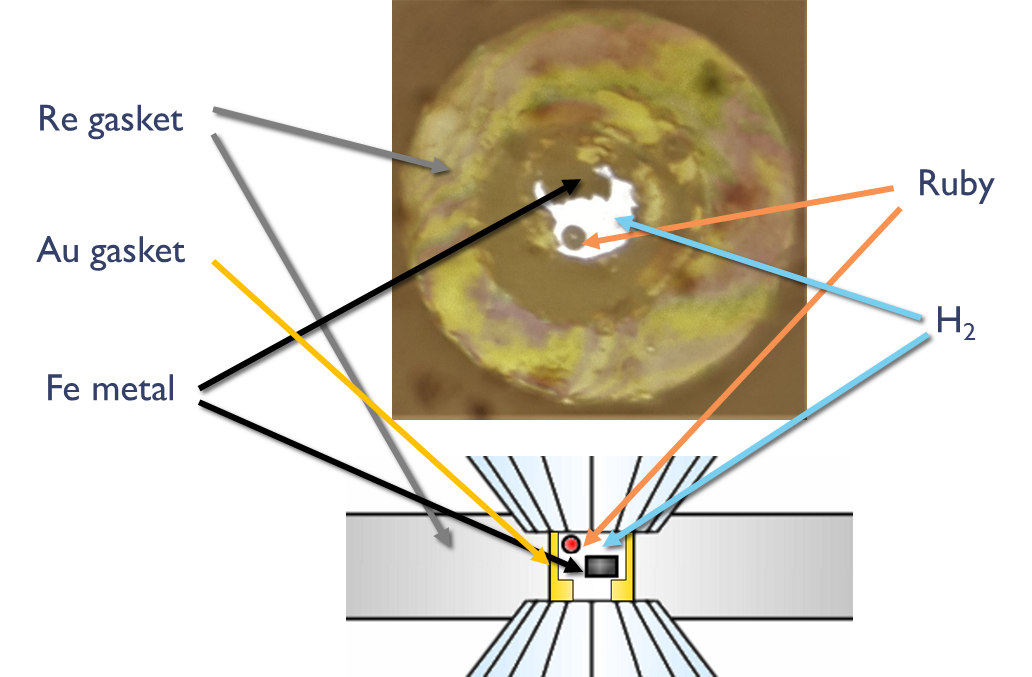


Figure S1. Photo and scheme of a typical loading.


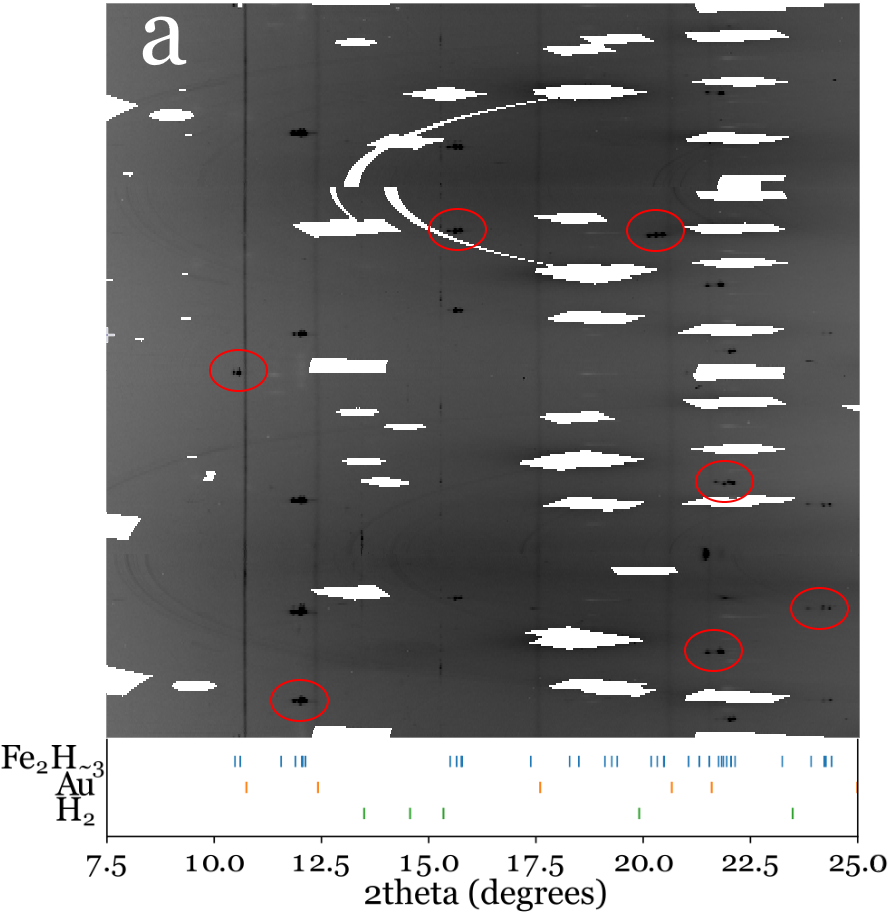

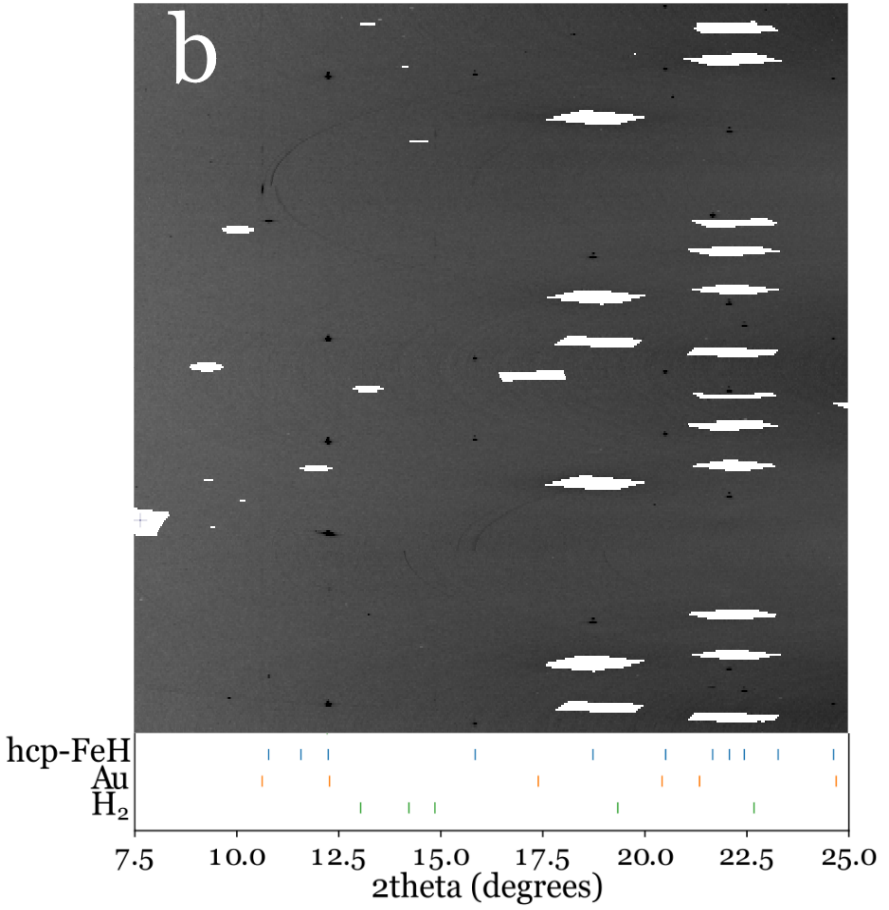


Fig. S2. Unrolled diffraction patterns of monoclinic Fe2H~3 with C2/m space group at 65.1(2) GPa (a) and hcp-FeH at 49.0(6) GPa and room temperature. Diamond peaks and detector glitches are masked. A clear peak splitting (e.g. indicated by red ellipses) in the *C*2/*m* phase can be observed.


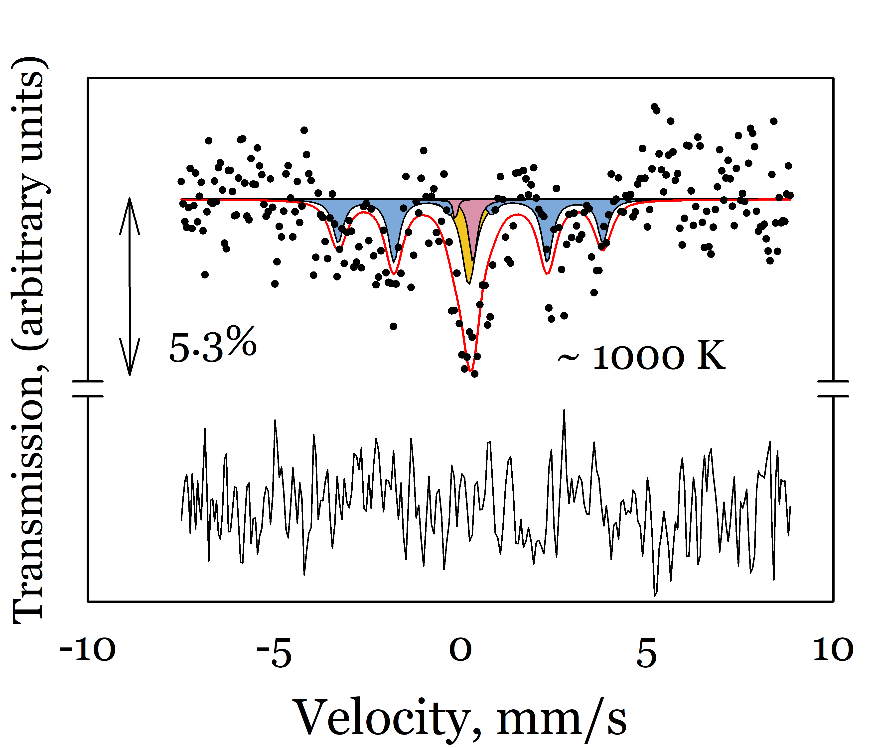


Fig S3. SMS spectrum of Fe2H~3 at 63.2(1.4) GPa and ca. 1000 K. Solid lines show the theoretical fit, the percentage bar indicates the relative absorptions, and the residuals of the fit are indicated below the spectrum. Light-red nonmagnetic components are from the beamline optics.


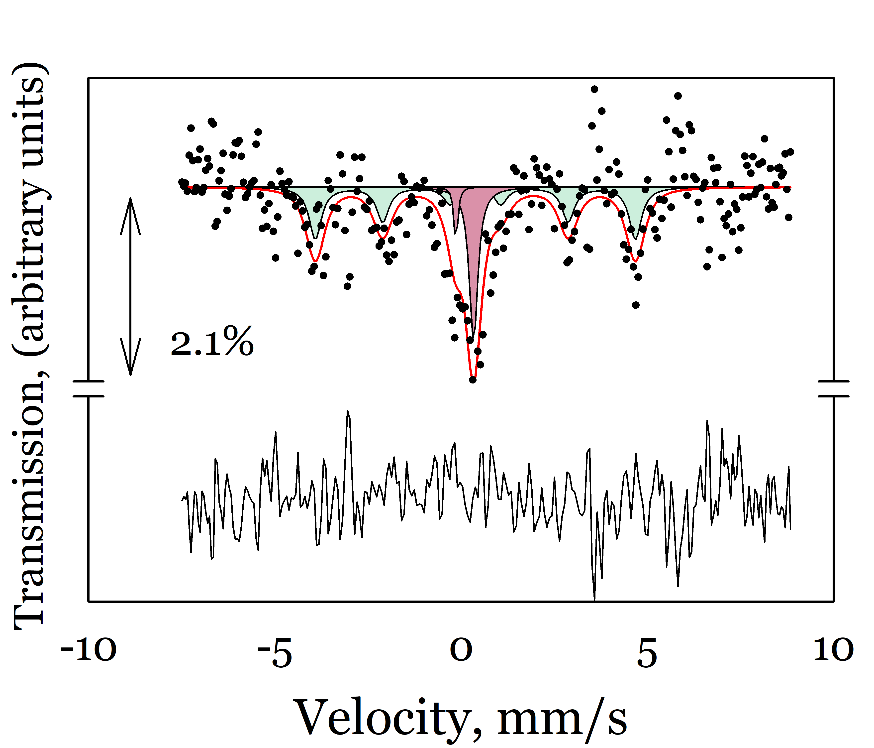


Fig S4. SMS spectrum of amorphous Fe-H at 10.2(5) GPa and room temperature. The spectrum can be fitted by the single magnetic contribution with the hyperfine parameters similar to that of dhcp-FeH (Fig. 4a, table S1). Solid lines show the theoretical fit, the percentage bar indicates the relative absorptions, and the residuals of the fit are indicated below the spectrum. Light-red nonmagnetic components are from the beamline optics. A significant decrease in the relative absorption is likely related to the decrease of the Lamb-Mössbauer factor in the amorphous material.

Supplementary Table 1. Hyperfine parameters of iron hydrides.

| **dhcp-FeH** |  |  |  |  |  |  |  |  |  |  |
| --- | --- | --- | --- | --- | --- | --- | --- | --- | --- | --- |
| P, GPa | H-site | | | | C-site | | | | Nonmagnetic component | |
| CS | QS | Bfh | Relative weight | CS | QS | Bfh | Relative weight | CS | Relative weight |
| 6.05(7) | 0.423(8) | -0.022(15) | 30.70(7) | 56(2) | 0.419(8) | 0.043(15) | 27.23(7) | 44(2) |  |  |
| 12.1(4) | 0.39(1) | -0.03(2) | 29.57(10) | 50(3) | 0.386(9) | 0.036(17) | 26.03(8) | 50(3) |  |  |
| 17.4(6) | 0.36(1) | -0.02(3) | 28.03(14) | 46(4) | 0.356(11) | 0.04(2) | 24.64(11) | 53(4) | 0.34(14) | 1(1) |
| 23.0(1.3) | 0.353(8) | 0.00(2) | 25.62(10) | 54(5) | 0.34(2) | 0.05(4) | 22.6(3) | 40(5) | 0.26(4) | 6(2) |
| 24.6(1.8) | 0.35(1) | -0.03(2) | 25.30(12) | 48(4) | 0.34(1) | 0.046(18) | 22.01(11) | 45(4) | 0.31(4) | 7(2) |
| 28(4) | 0.32(1) | 0.00(2) | 23.74(16) | 53(6) | 0.311(12) | 0.02(7) | 19.4(5) | 27(7) | 0.288(12) | 20(3) |
| 36.4(1.3) | 0.3(1) | 0.11* | 18.5(8) | 37(4) |  |  |  |  | 0.270(13) | 63(4) |
| 40.98(11) | 0.29(4) | 0.11(7) | 18.4(3) | 32(3) |  |  |  |  | 0.244(13) | 68(3) |
| 46.8(5) | 0.2(1) | 0.11(15) | 10.7(8) | 26(5) |  |  |  |  | 0.235(12) | 74(5) |
| 61.2(1.4) |  |  |  |  |  |  |  |  | 0.190(5) | 100 |
|  |  |  |  |  |  |  |  |  |  |  |
| **fcc-FeH** |  |  |  |  |  |  |  |  | CS | Relative weight |
| 63.2(1.4) |  |  |  |  |  |  |  |  | 0.21(3) | 100 |
|  |  |  |  |  |  |  |  |  |  |  |
| **Fe2H~3** |  |  |  |  |  |  |  |  |  |  |
| P, GPa | Magnetic component | | | |  |  |  |  | Nonmagnetic component | |
| CS | QS | Bfh | Relative weight |  |  |  |  | CS | Relative weight |
| 63.2(5) | 0.32(3) | 0.03(5) | 21.1(2) | 68(2) |  |  |  |  | 0.16(2) | 32(2) |
| 63.2(5)  1000(100) K | 0.17(9) | -0.25(17) | 22.6(7) | 65(inf) |  |  |  |  | 0.23(inf) | 35(inf) |
|  |  |  |  |
|  |  |  |  |  |  |  |  |  |  |  |
| **hcp-FeH** |  |  |  |  |  |  |  |  |  |  |
| P, GPa | Magnetic component | | | |  |  |  |  | Nonmagnetic component | |
| CS | QS | Bfh | Relative weight |  |  |  |  | CS | Relative weight |
| 52.3(5) | 0.22(5) | 0.02(9) | 13.3(4) | 56(5) |  |  |  |  | 0.22(3) | 44(5) |
| 43.7(7) | 0.229(18) | 0.00(3) | 16.64(14) | 68(2) |  |  |  |  | 0.26(2) | 32(2) |
| 31.2(5) | 0.33(4) | 0* | 22.2(4) | 76(5) |  |  |  |  | 0.24(8) | 24(5) |
|  |  |  |  |  |  |  |  |  |  |  |
| **Amorphous** |  |  |  |  |  |  |  |  |  |  |
| P, GPa | Magnetic component | | | |  |  |  |  |  |  |
| CS | QS | Bfh | Relative weight |  |  |  |  |  |  |
| 10.2(5) | 0.39(7) | 0* | 26.5(6) | 100 |  |  |  |  |  |  |

Supplementary Table 2. Unit cell parameters of the hcp-FeH and Fe2H~3.

| **Fe2H~3** |  |  |  |  |  |
| --- | --- | --- | --- | --- | --- |
| P, GPa | a, Å | b, Å | c, Å | β, ° | c/b |
| 65.1(2) | 4.4995(5) | 2.5574(3) | 4.0819(7) | 90.956(11) | 1.596 |
| 62.7(2) | 4.5070(4) | 2.5598(2) | 4.0870(6) | 90.960(10) | 1.596 |
| 56.3(3) | 4.4564(7) | 2.5412(3) | 4.095(3) | 90.392(10) | 1.611 |
|  |  |  |  |  |  |
| **hcp-FeH** |  |  |  |  |  |
| P, GPa | a, Å |  | c, Å |  | c/a |
| 56.7(3) | 2.51165(16) |  | 4.0472(3) |  | 1.611 |
| 47.7(6) | 2.52557(13) |  | 4.0781(4) |  | 1.615 |
| 49.0(6) | 2.52616(11) |  | 4.0772(5) |  | 1.614 |
| 33.1(1) | 2.56507(11) |  | 4.1460(6) |  | 1.616 |
| 24.7 (1) | 2.59536(17) |  | 4.1987(7) |  | 1.618 |

Supplementary Table 3. Parameters of the equation of state obtained by the fit of the experimental data to the Birth-Murnaghan equation of state.

| Phase | V0, Å3 | K0, GPa | K0’ |
| --- | --- | --- | --- |
| Fe hcpa | 11.234 | 165* | 4.97 |
| FeH dhcpb | 13.341 | 193 | 3.54 |
| FeH fccc | 13.45 | 99 | 11.7 |
| FeH-hcp | 13.74 | 166 | 4* |
| FeH2 tetragonalb | 17.177 | 111 | 5.17 |

a: taken from ref. [50]; b: fitted data from ref. [14]; c: taken from ref. [21].The values marked by the asterisk symbol (*) were fixed during the refinement.
